# Supplementary material for: The impact of triglyceride-glucose index on ischemic stroke: a systematic review and meta-analysis
Source: Springer Nature journal article supplement (doi:10.1186/s12933-022-01732-0), 2023-01-06
Supplement: MOESM10 [file 12933_2022_1732_MOESM10_ESM.pdf]

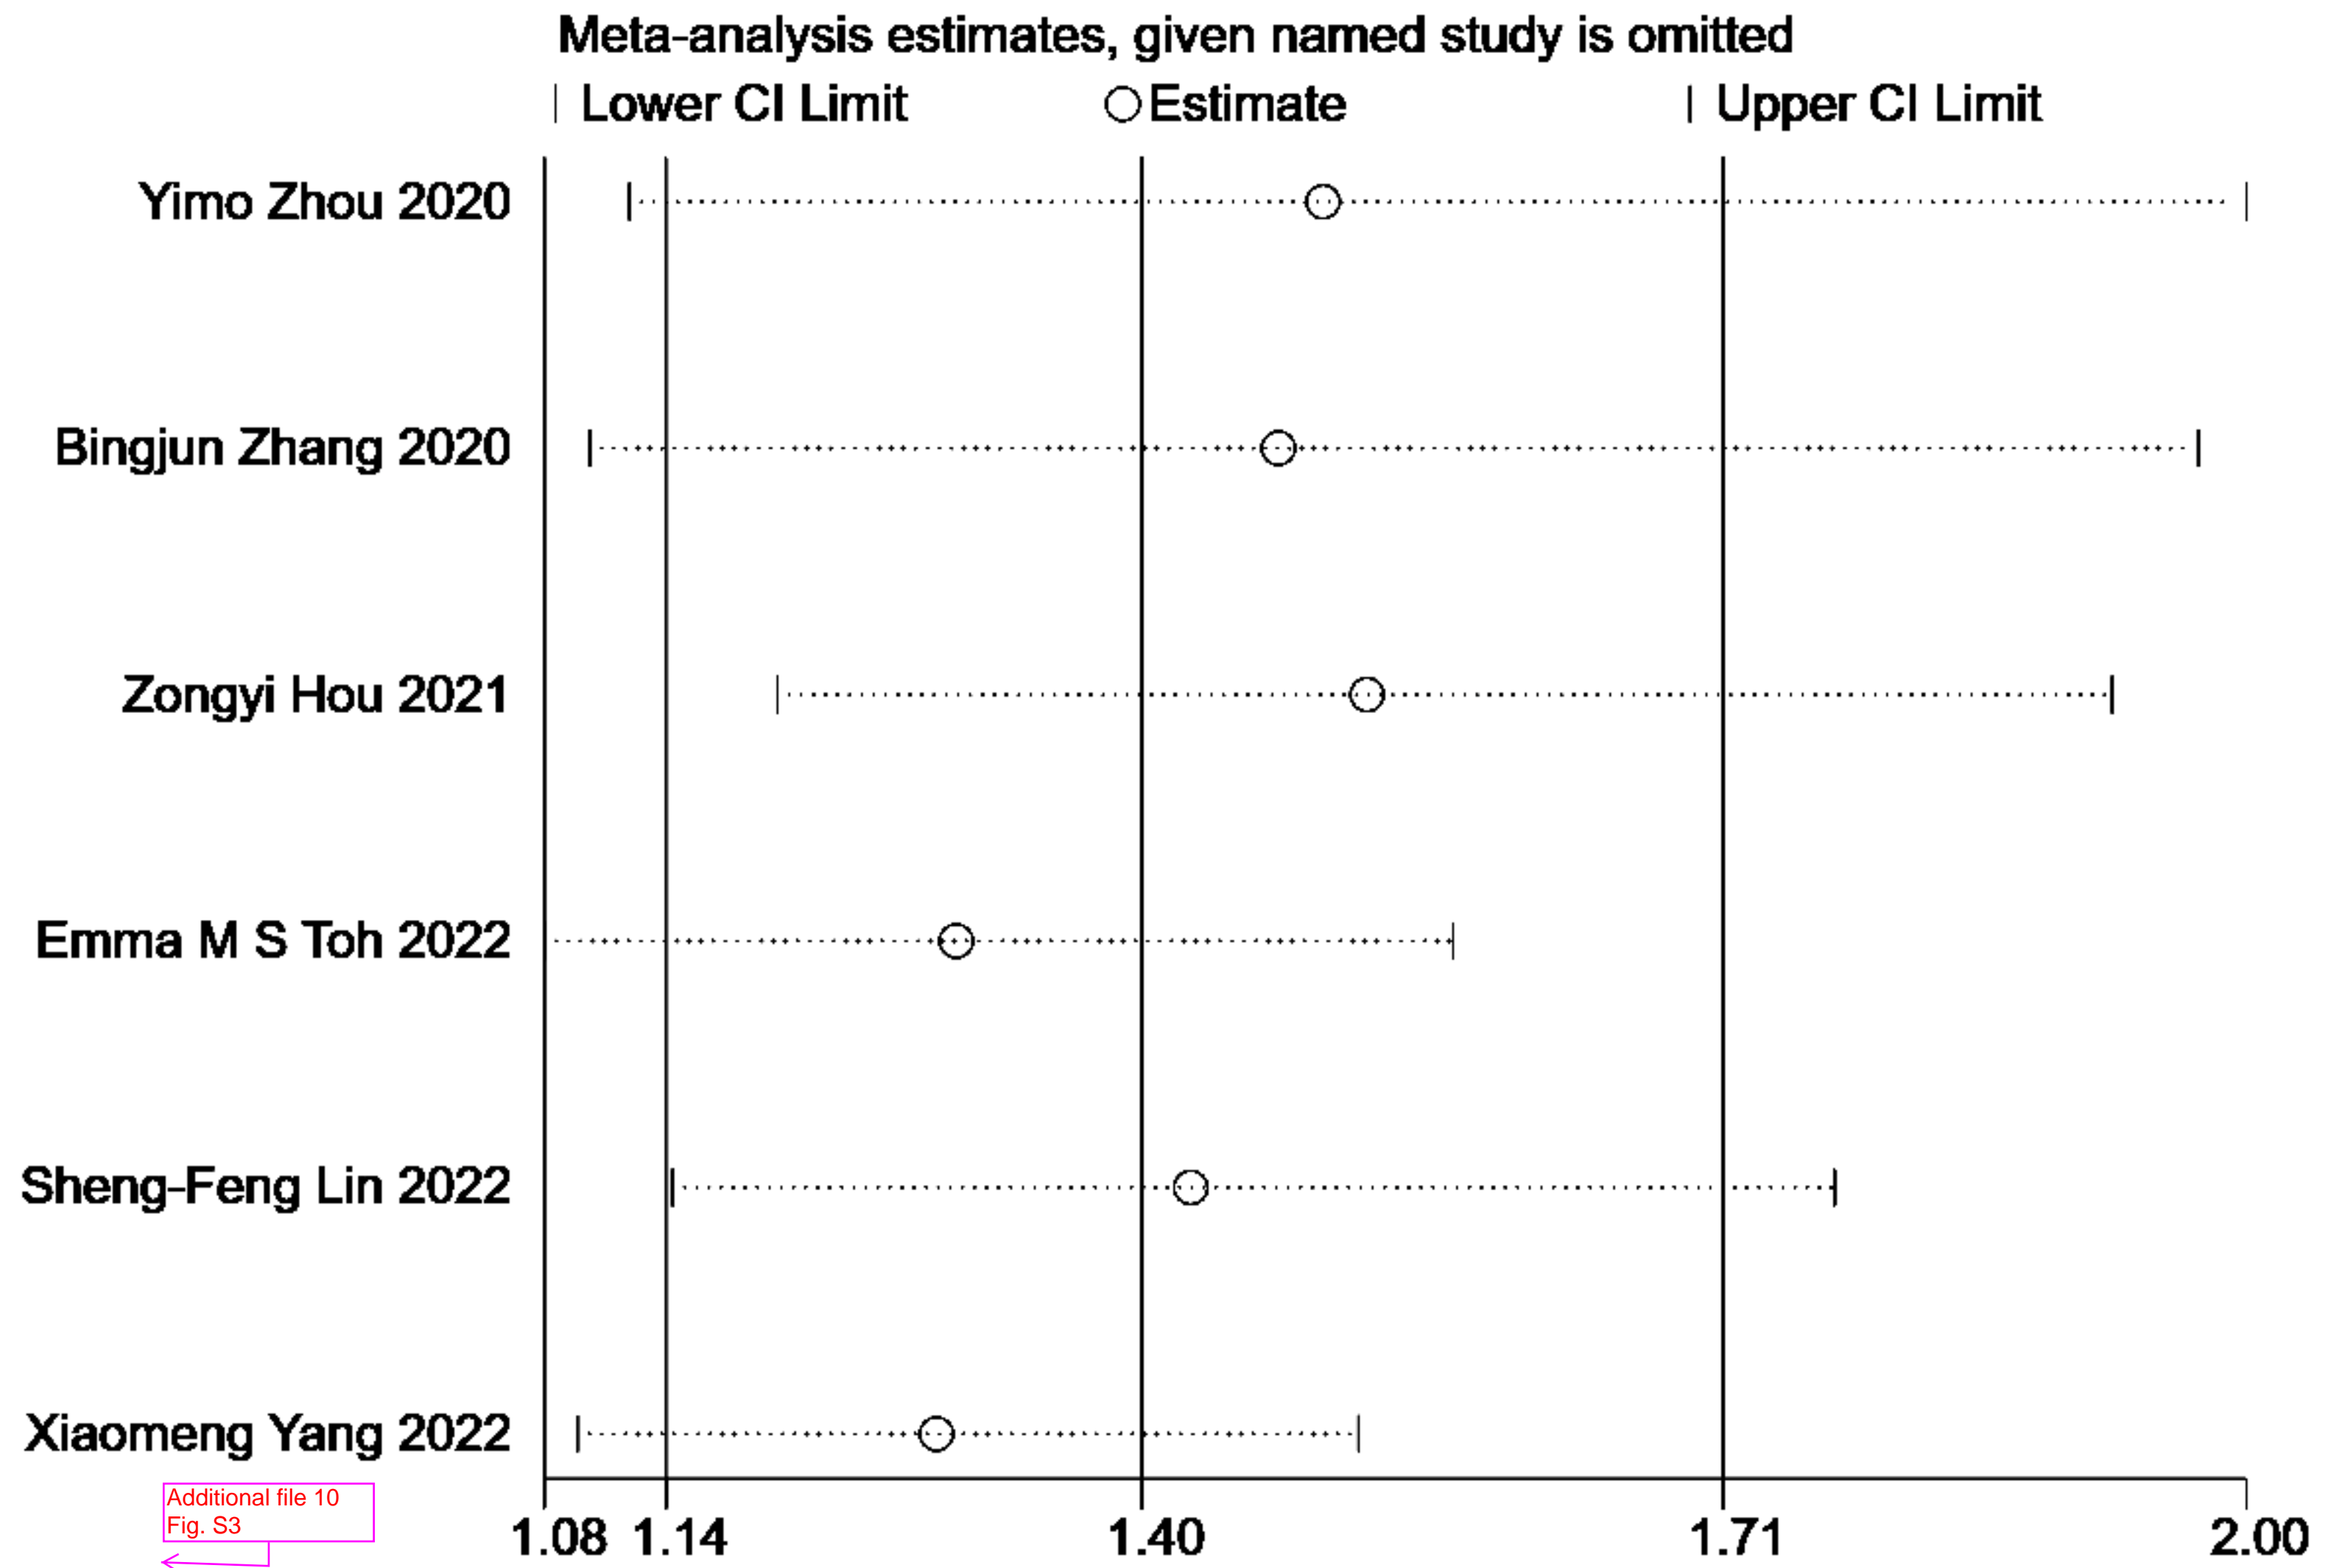

Additional file10 Fig. S3 Sensitivity analysis for the association of TyG index with Mortality among patients with ischemic stroke.
